# Supplementary material
Source: publisher figshare collection journal article supplement (https://sage.figshare.com/ndownloader/files/20020667)
Supplement: Supplementary file 1 [file 20020667]

Table 3. Learning subject prioritization by rank order listing

| Please rank in order (from 1-6) which topics you feel would be most important to cover in education<br>(1 most important - 6 least important) |               |                                                       |                                    |                                                      |                                     |                                            |
|-----------------------------------------------------------------------------------------------------------------------------------------------|---------------|-------------------------------------------------------|------------------------------------|------------------------------------------------------|-------------------------------------|--------------------------------------------|
|                                                                                                                                               | Goals of care | Family needs of<br>a child<br>enrolling in<br>hospice | Pediatric<br>symptom<br>management | Spiritual and<br>ethical issues in<br>pediatric care | Pediatric<br>developmental<br>needs | Care for the<br>medical staff<br>caregiver |
| 1                                                                                                                                             | 12            | 3                                                     | 11                                 | 2                                                    | 1                                   | 2                                          |
| 2                                                                                                                                             | 8             | 12                                                    | 7                                  | 3                                                    | 1                                   | 0                                          |
| 3                                                                                                                                             | 4             | 8                                                     | 5                                  | 5                                                    | 7                                   | 2                                          |
| 4                                                                                                                                             | 3             | 4                                                     | 5                                  | 9                                                    | 7                                   | 3                                          |
| 5                                                                                                                                             | 3             | 1                                                     | 2                                  | 12                                                   | 12                                  | 1                                          |
| 6                                                                                                                                             | 1             | 3                                                     | 1                                  | 0                                                    | 3                                   | 23                                         |
